# Supplementary material for: Operando spectroscopic analyses for the ammonia absorption process of sodium borohydride
Source: Royal Society of Chemistry journal article supplement (doi:10.1039/c8cc08048h), 2018-12-18
Supplement: c8cc08048h1.pdf [file c8cc08048h1.pdf]

## Electronic Supporting Information (ESI)

### Operando spectroscopic analyses for ammonia absorption process of sodium borohydride

Keita Nakajima,<sup>a</sup> Hiroki Miyaoka,<sup>a, b</sup> Kenichi Kojima,<sup>c</sup> Takayuki Ichikawa<sup>\*b, c, d</sup> and Yoshitsugu Kojima<sup>a, b</sup>

<sup>a</sup> Graduate School of Advanced Sciences of Matter, Hiroshima University, 1-3-1 Kagamiyama, Higashi-Hiroshima, 739-8530, Japan

<sup>b</sup> Natural Science Center for Basic Research and Development, Hiroshima University, 1-3-1 Kagamiyama, Higashi-Hiroshima 739-8530, Japan

<sup>c</sup> Graduate School of Integrated Arts and Sciences, Hiroshima University, 1-7-1 Kagamiyama, Higashi-Hiroshima 739-8521, Japan

<sup>d</sup> Graduate School of Engineering, Hiroshima University, 1-4-1 Kagamiyama, Higashi-Hiroshima 739-8527, Japan

E-mail: [tichi@hiroshima-u.ac.jp](mailto:tichi@hiroshima-u.ac.jp)

## Experimental Section

Sodium borohydride ( $\text{NaBH}_4$ , 99.99 %, Aldrich) was purchased and used for the experiments. All the samples were handled in an argon glovebox purified by a gas recycling purification system (MP-P-60W, Miwa MFG Co., Ltd.) to minimize oxygen and water content. For investigating the  $\text{NH}_3$  absorbed state of  $\text{NaBH}_4$ , nuclear magnetic resonance (NMR), and Fourier transform infrared spectroscopy (FT-IR) measurements were carried out. Here,  $\text{NH}_3$  absorbed  $\text{NaBH}_4$  was stable only under the  $\text{NH}_3$  pressure thermodynamically, therefore all measurements were performed under  $\text{NH}_3$  atmosphere.  $^1\text{H}$  and  $^{11}\text{B}$  NMR spectra were recorded on a Lambda500 spectrometer (JEOL Co. Ltd.) in a magnetic field of 11.7 T.  $\text{NaBH}_4$  was packed into High Pressure Valved NMR Tube (Tokyo Chemical Industry Co., Ltd.) which can be used from vacuum to 0.86 MPa of  $\text{NH}_3$  pressure. Chemical shifts were referenced to chloroform at 7.26 ppm for  $^1\text{H}$  and saturated boric acid aqueous solution at 19.49 ppm for  $^{11}\text{B}$ . Spectra were acquired with the pulse widths of 1.5–2.0 and 1.75–2.0  $\mu\text{s}$ , and relaxation delays of 5 and 6 s for  $^1\text{H}$  and  $^{11}\text{B}$ , respectively. FT-IR (Spectrum One, Perkin-Elmer) equipped with diffuse reflection cell were used to observe infrared absorption spectra. The sample cell made of stainless and equipped with ZnSe window was hand-made by Hydrolab Inc., and the available pressure range is from vacuum to 0.86 MPa of  $\text{NH}_3$  pressure. The samples were measured without dilution. Spectra were recorded at 4 accumulations with 4  $\text{cm}^{-1}$  spectral resolution. The NMR tube and sample cell for FT-IR were connected to the Sievert-type experimental system composed of a pressure gauge (Druck, DPI280),  $\text{NH}_3$  cylinder (99.999%), rotary pump, and buffer, where the details are explained in the previous paper<sup>15</sup>. By using the systems, all the analyses can be conducted with the PCI measurements to know the  $\text{NH}_3$  absorption stages. The NMR and FTIR measurements are repeated by the connection and disconnection of the sample tube for NMR and vessel for FT-IR from PCI apparatus, respectively (See Fig. S1).

Figures

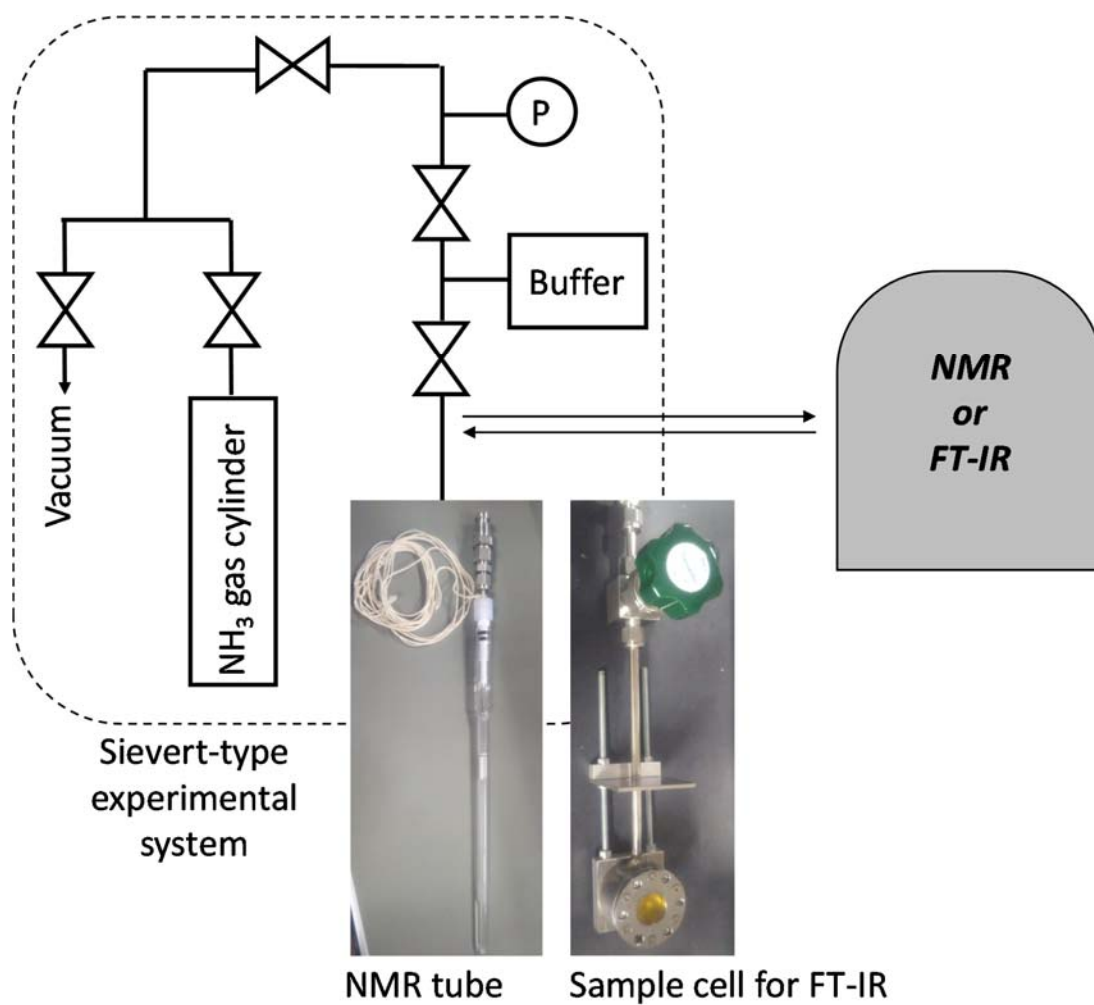

Fig. S1 The schematic illustrations of the operand NMR and FT-IR measurement systems.

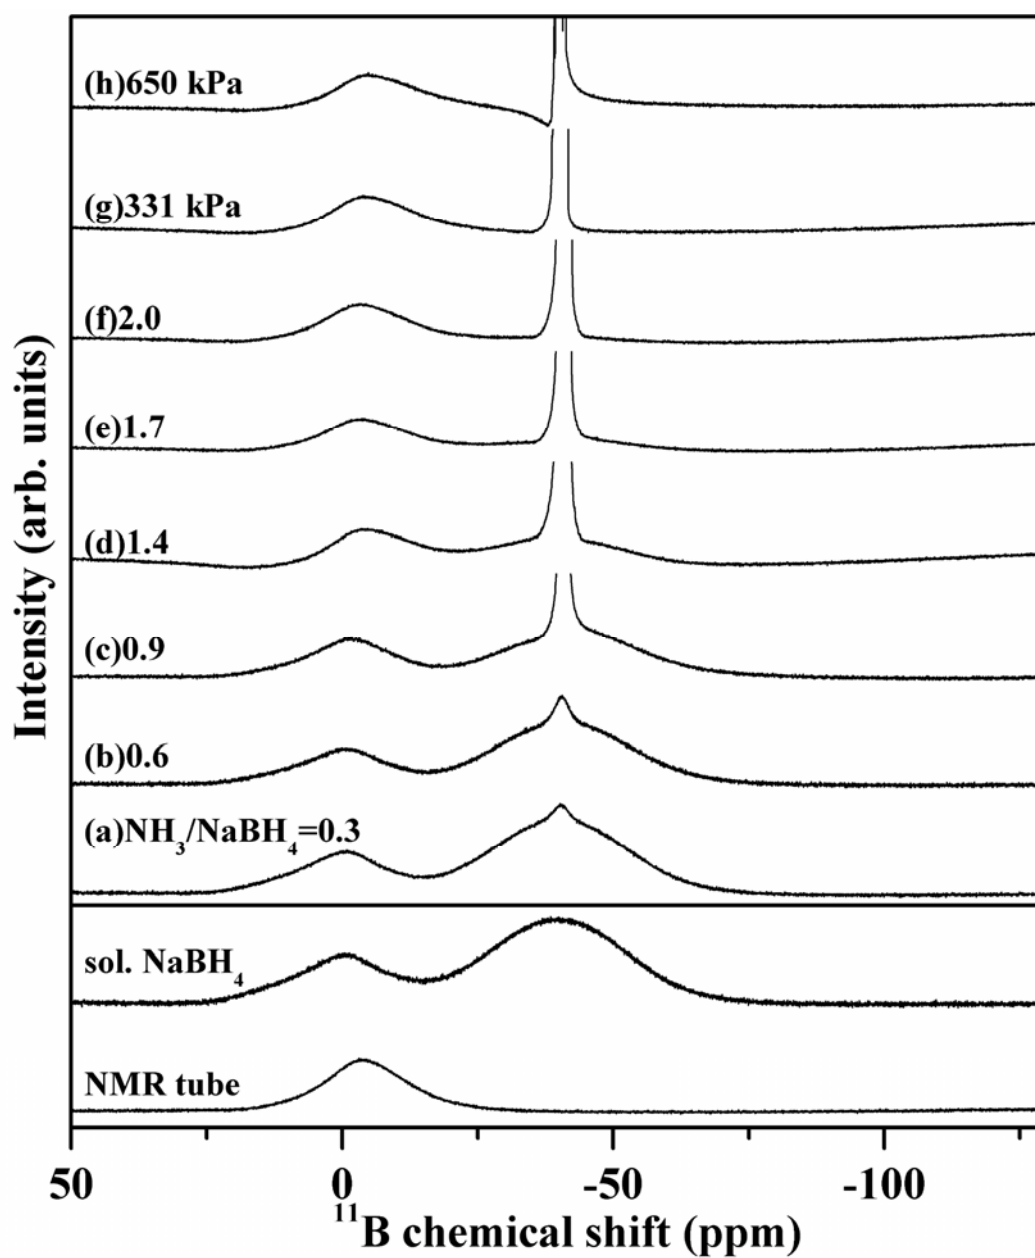

Fig. S2 Operand  $^{11}\text{B}$  NMR results for  $\text{NaBH}_4$  at the plateau region with  $\text{NH}_3/\text{NaBH}_4(\text{mol/mol}) =$  (a) 0.3, (b) 0.6, (c) 0.9, (d) 1.4, (e) 1.7, (f) 2.0, and under (g) 331 kPa, (h) 650 kPa of  $\text{NH}_3$ . All the data is same as those of Fig. 1, and scale is normalized by the peak intensity of NMR tube (background).

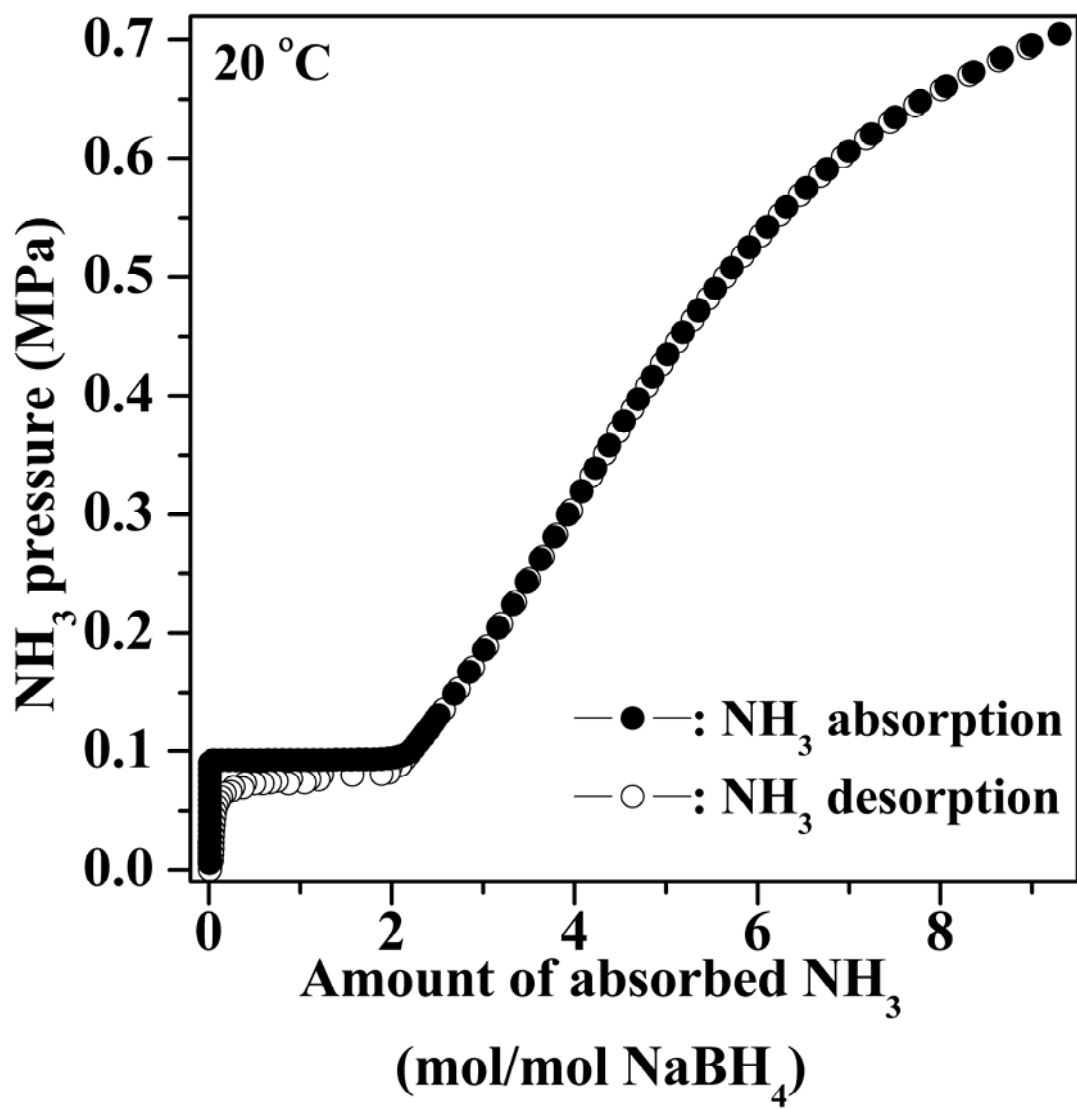

Fig. S3 PC isotherms for NH<sub>3</sub> absorption (●) and desorption (○) of NaBH<sub>4</sub> at 20 °C.

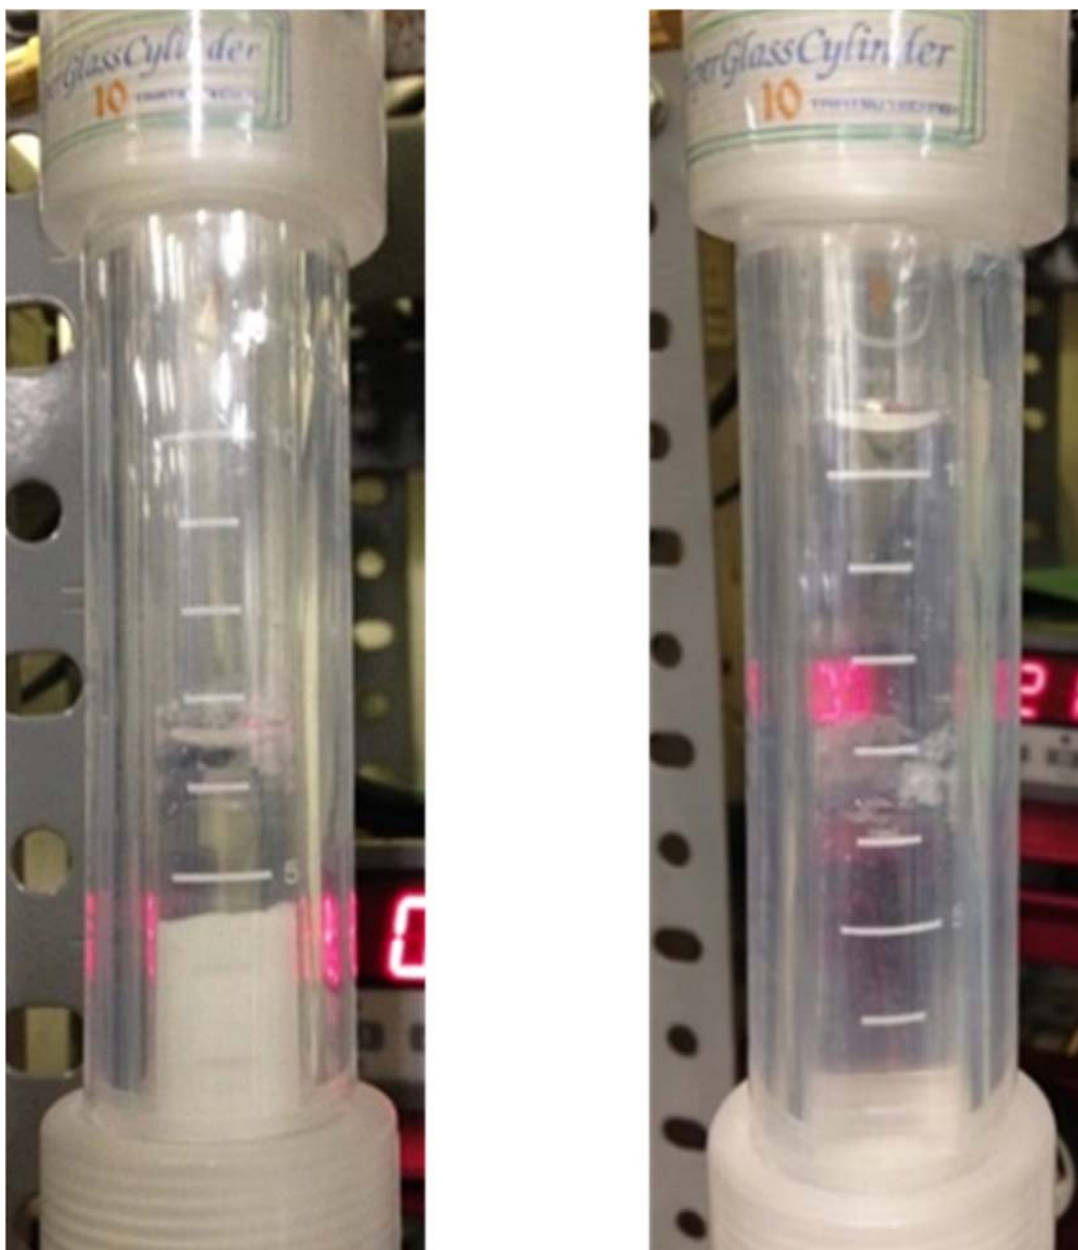

Fig. S4 The images of  $\text{NaBH}_4$  under the plateau pressure (left) and the higher pressure than the plateau pressure (right).

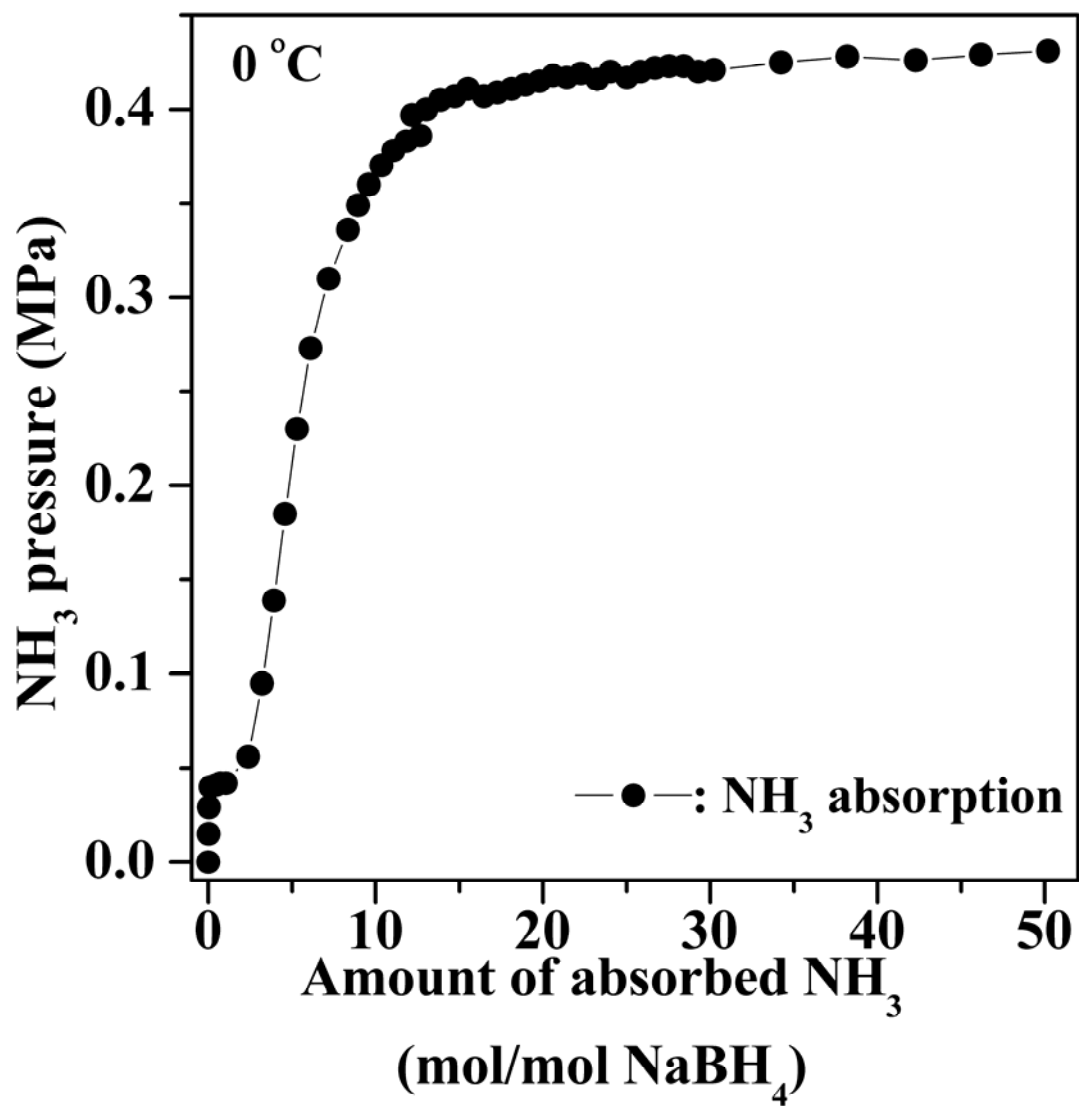

Fig. S5 PC isotherms for  $\text{NH}_3$  absorption of  $\text{NaBH}_4$  at  $0\text{ }^\circ\text{C}$ .
